# Supplementary material for: RGD peptide-mimicking random copolymers synthesized via rapid and controllable NCA polymerization to promote cell adhesion
Source: Royal Society of Chemistry journal article supplement (doi:10.1039/d5py00389j), 2025-01-01
Supplement: d5py00389j1.pdf [file d5py00389j1.pdf]

## Supporting information

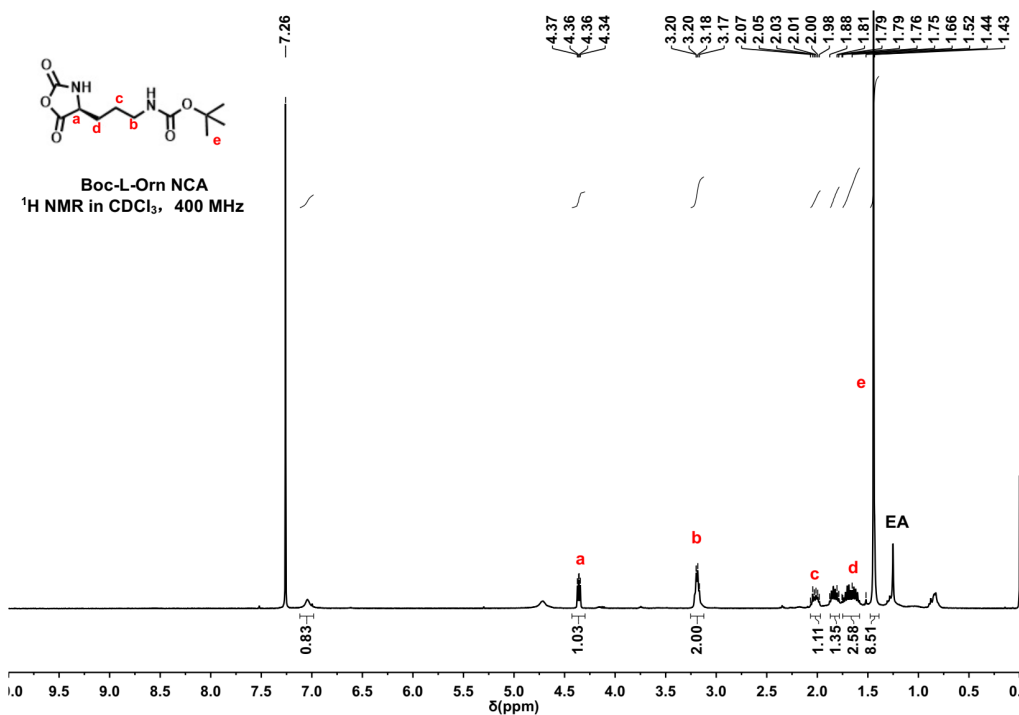

**Figure S1.**  $^1\text{H}$  NMR spectrum of *N* $\delta$ -*tert*-butoxycarbonyl-L-ornithine (Boc-L-Orn) NCA in  $\text{CDCl}_3$ , 400 MHz.

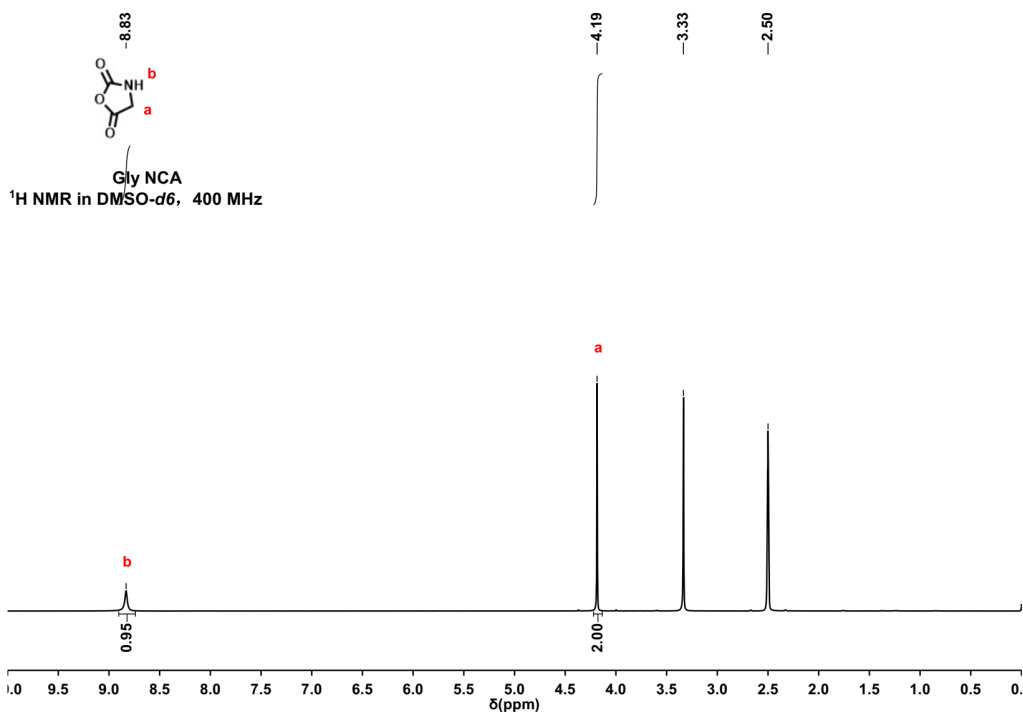

**Figure S2.**  $^1\text{H}$  NMR spectrum of glycine (Gly) NCA in  $\text{DMSO}-d_6$ , 400 MHz.

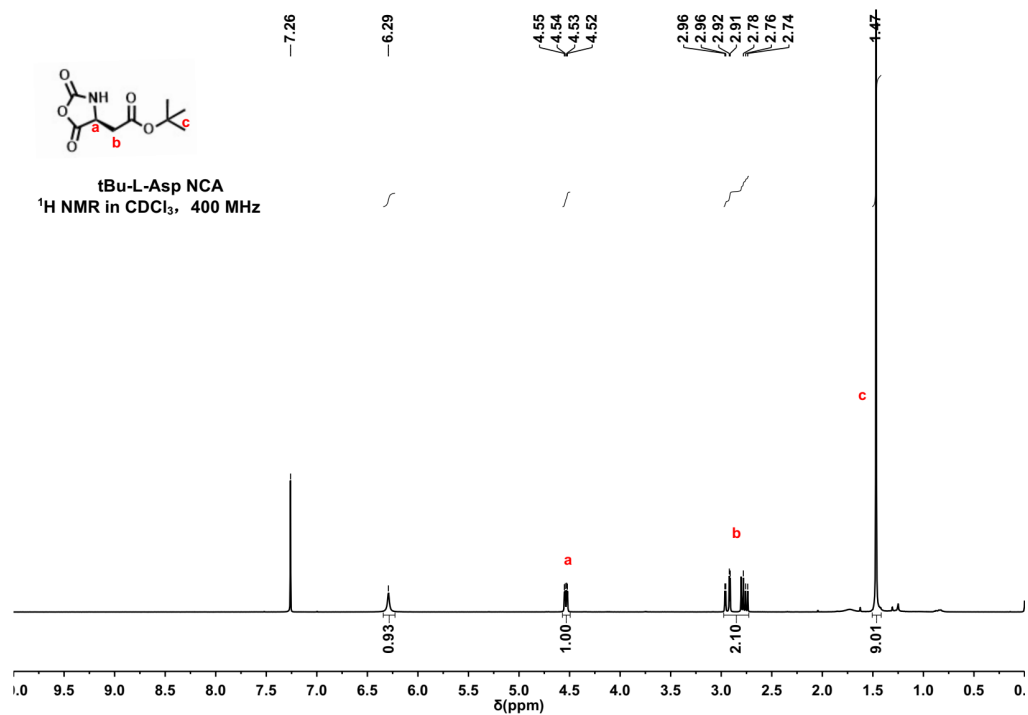

**Figure S3.** <sup>1</sup>H NMR spectrum of L-aspartic acid 4-*tert*-butyl ester (tBu-L-Asp) NCA in CDCl<sub>3</sub>, 400 MHz.

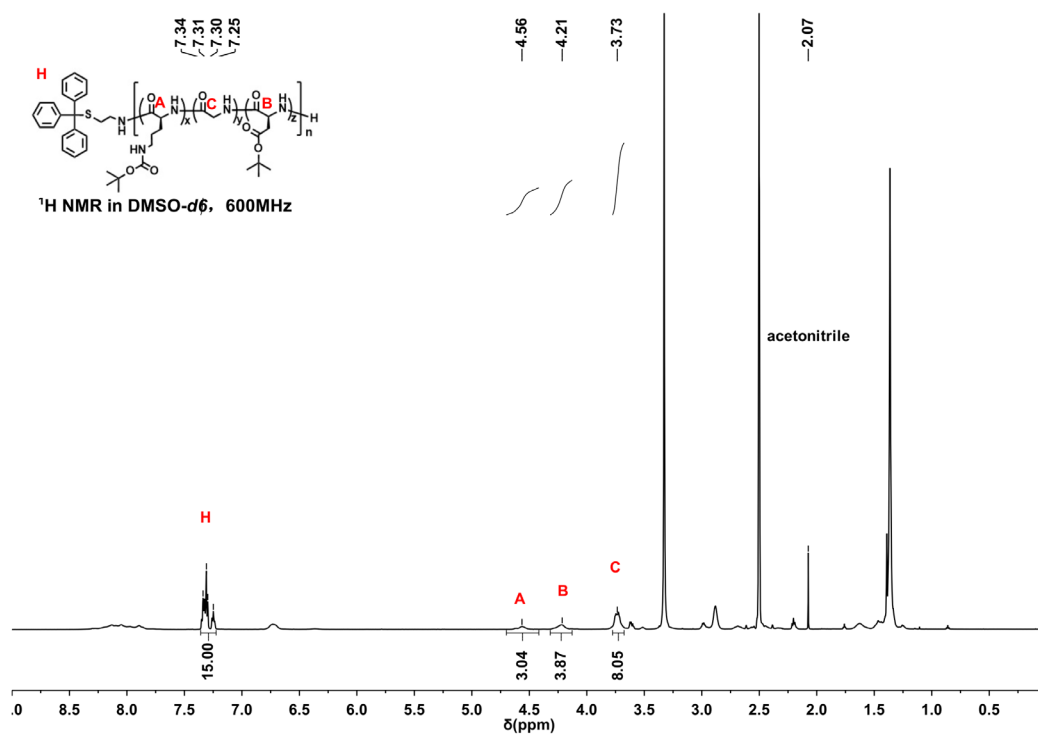

**Figure S4.** <sup>1</sup>H NMR spectrum of P(Orn<sub>X</sub>%-Gly<sub>Y</sub>%-Asp<sub>Z</sub>%)<sub>n</sub> (DP = 10) at a protected stage in DMSO-*d*<sub>6</sub>, 600 MHz.

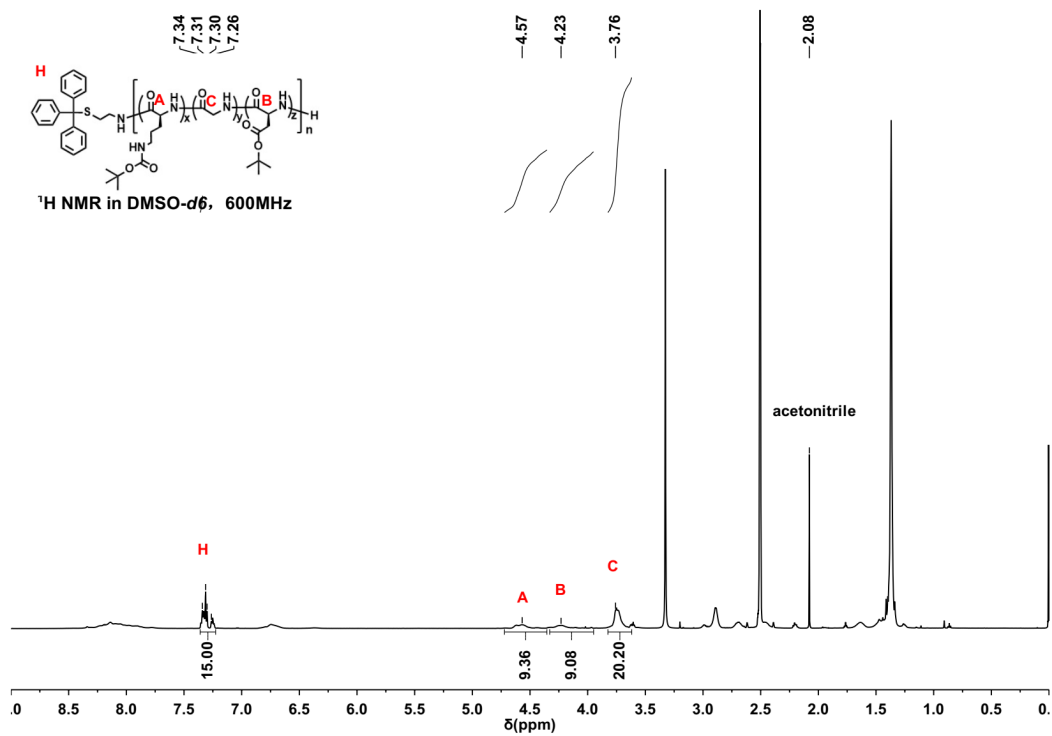

**Figure S5.** <sup>1</sup>H NMR spectrum of P(Orn<sub>x</sub>%-Gly<sub>y</sub>%-Asp<sub>z</sub>%)<sub>n</sub> (DP = 30) at a protected stage in DMSO-*d*<sub>6</sub>, 600 MHz.

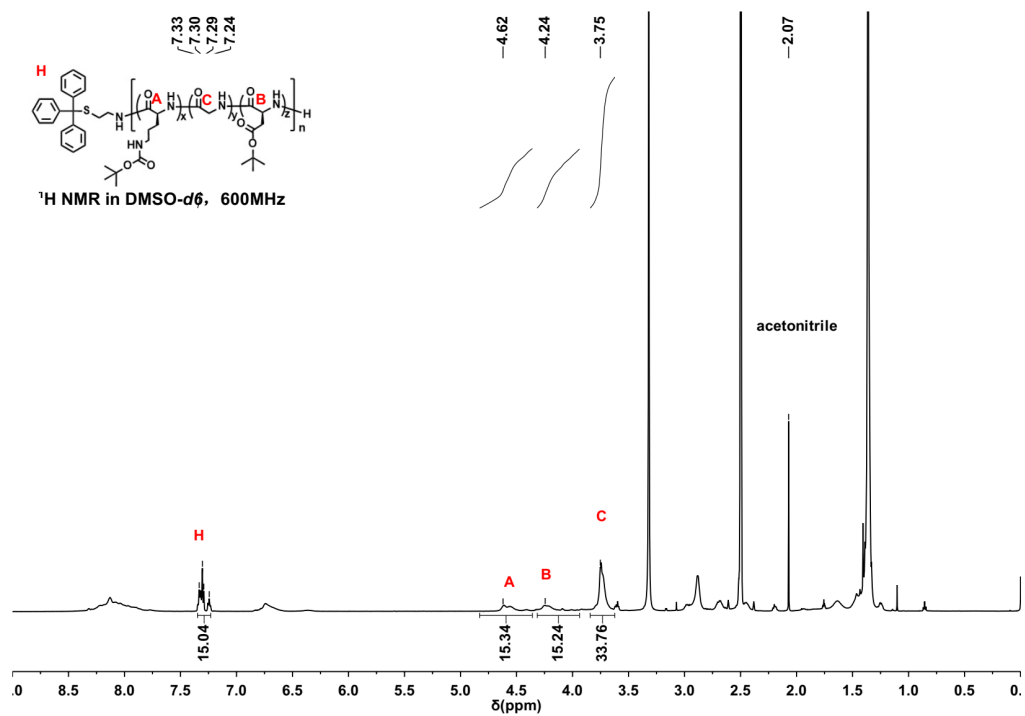

**Figure S6.** <sup>1</sup>H NMR spectrum of P(Orn<sub>x</sub>%-Gly<sub>y</sub>%-Asp<sub>z</sub>%)<sub>n</sub> (DP = 50) at a protected stage in DMSO-*d*<sub>6</sub>, 600 MHz.

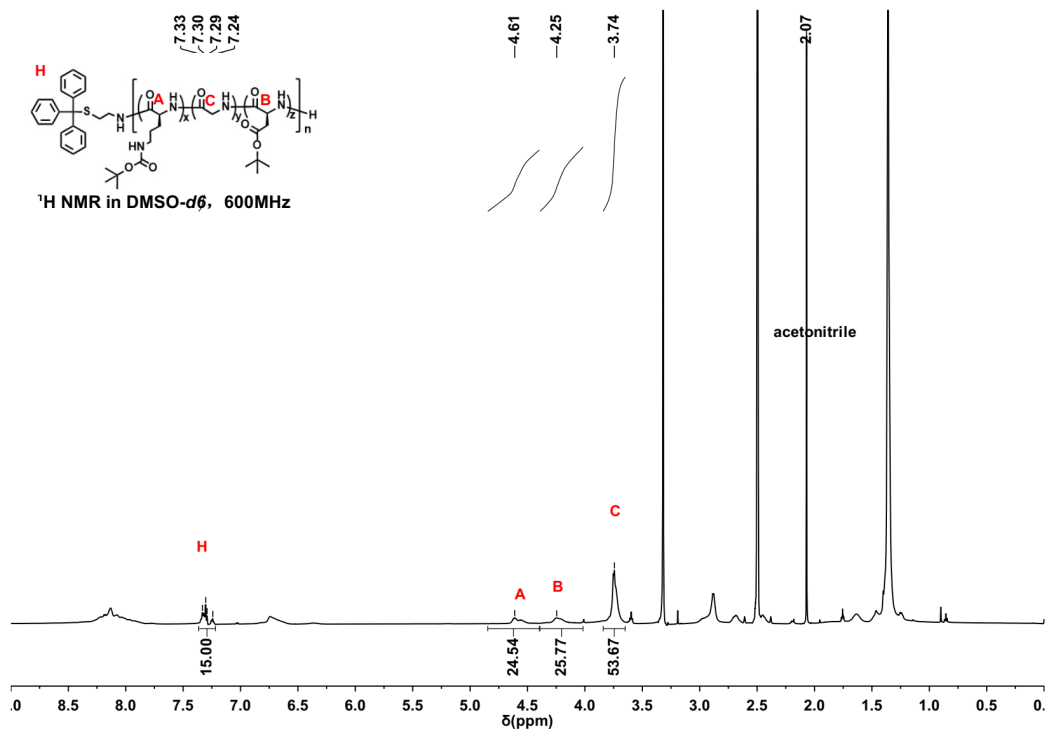

**Figure S7.** <sup>1</sup>H NMR spectrum of P(Orn<sub>x</sub>%-Gly<sub>y</sub>%-Asp<sub>z</sub>%)<sub>n</sub> (DP = 80) at a protected stage in DMSO-*d*<sub>6</sub>, 600 MHz.

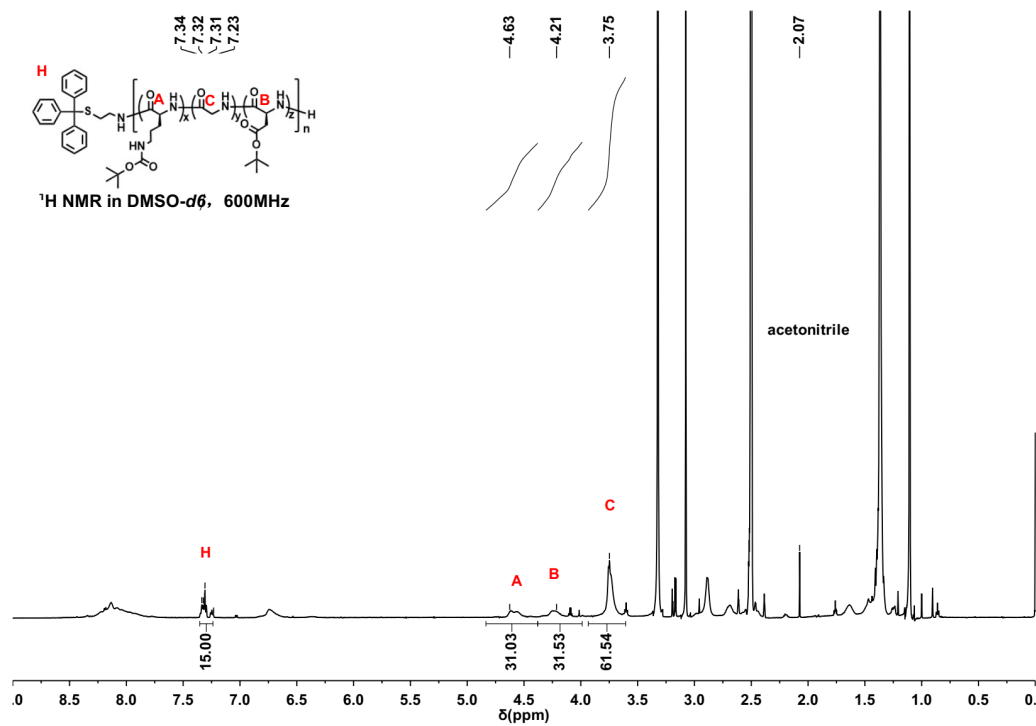

**Figure S8.** <sup>1</sup>H NMR spectrum of P(Orn<sub>x</sub>%-Gly<sub>y</sub>%-Asp<sub>z</sub>%)<sub>n</sub> (DP = 100) at a protected stage in DMSO-*d*<sub>6</sub>, 600 MHz.

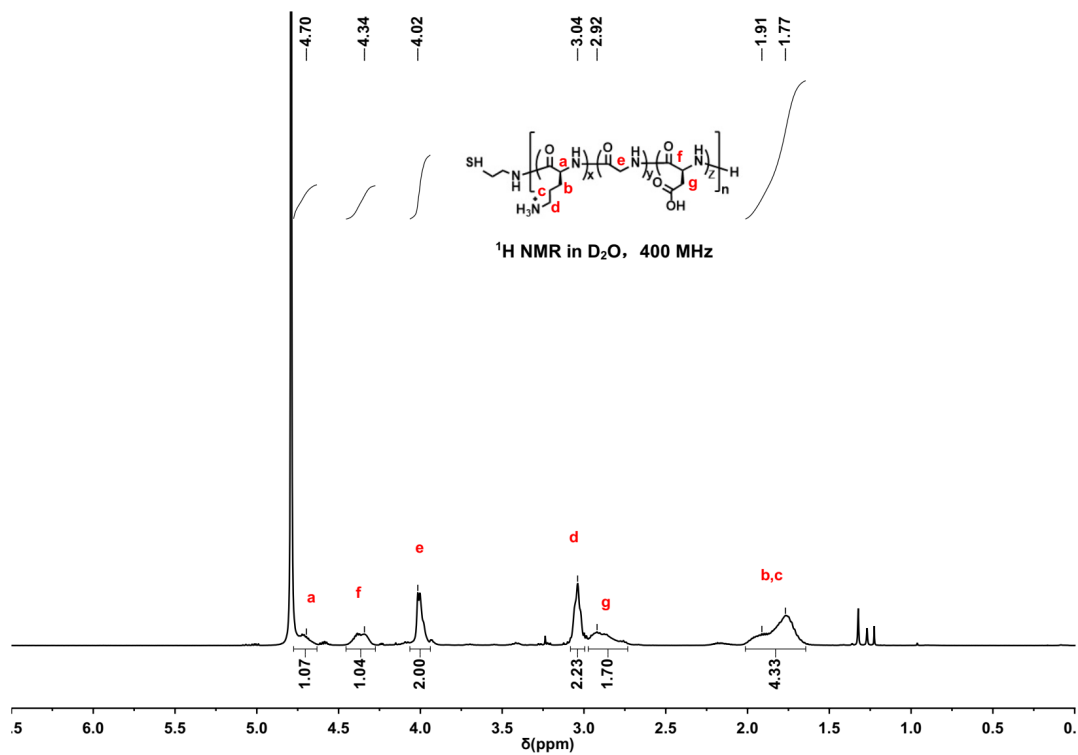

**Figure S9.** <sup>1</sup>H NMR spectrum of P-OGD (DP = 50) after deprotection in D<sub>2</sub>O, 400MHz.

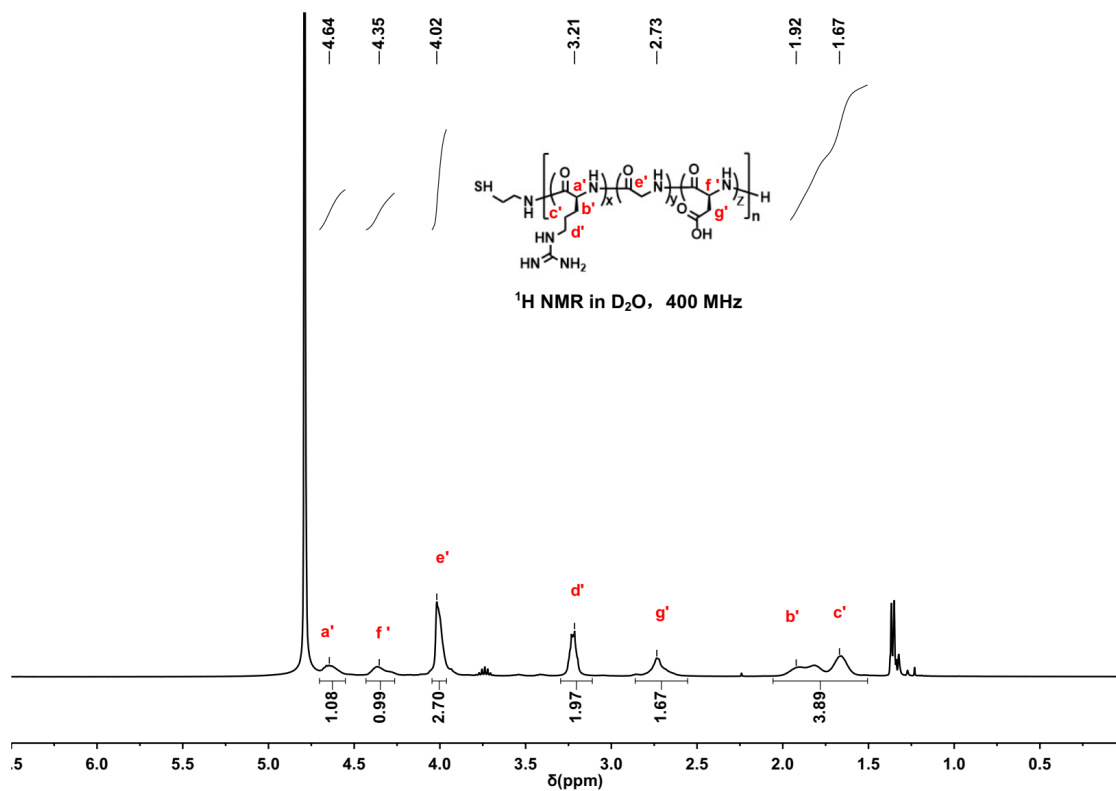

**Figure S10.** <sup>1</sup>H NMR spectrum of P-RGD (DP = 50) after guanidylation in D<sub>2</sub>O, 400 MHz.

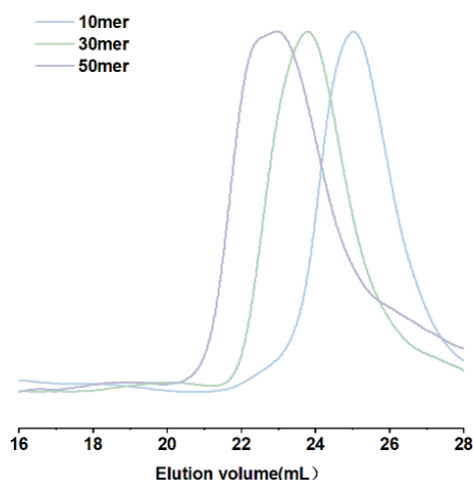

**Figure S11.** Gel permeation chromatography (GPC) characterization of polymers with different chain lengths before deprotection. GPC was performed on a Waters GPC instrument equipped with a Waters 1515 isocratic HPLC pump and a Waters 2414 refractive index detector using DMF supplemented with 0.01 M LiBr as the mobile phase at a flow rate of 1 mL/min at 50°C. The GPC were equipped by a Tosoh TSKgel Alpha-2500 column (particle size 7  $\mu$ m) and a Tosoh TSKgel Alpha-3000 column (particle size 7  $\mu$ m) linked in series.  $M_n$  and  $\bar{D}$  were calculated from a calibration curve using PMMA as standards.

**Table S1.** Characterization on polymers using GPC and  $^1\text{H}$  NMR.

| Polymer | GPC<br>characterization |            | $^1\text{H}$ NMR<br>characterization |    |
|---------|-------------------------|------------|--------------------------------------|----|
|         | $M_n$ (g/mol)           | $\bar{D}$  | DP                                   | DP |
| 10 mer  | 1680                    | 1.16       | 11                                   | 10 |
| 30 mer  | 4780                    | 1.21       | 32                                   | 29 |
| 50 mer  | 7400                    | 1.27       | 50                                   | 47 |
| 80 mer  | <i>N/A</i>              | <i>N/A</i> | <i>N/A</i>                           | 77 |
| 100 mer | <i>N/A</i>              | <i>N/A</i> | <i>N/A</i>                           | 93 |

<sup>a</sup>  $M_n$  is the obtained number average molecular weight,  $\bar{D}$  is the dispersity index, DP is the obtained degree of polymerization. *N/A* means uncharacterizable due to poor solubility.

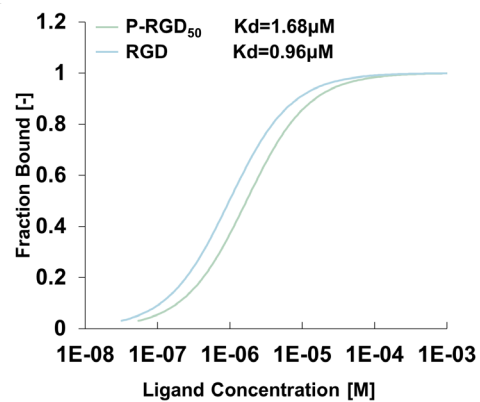

**Figure S12.** Dose-response analysis of the MST assays for determination of the binding affinity of the Integrin  $\alpha_v\beta_3$  with P-RGD<sub>50</sub> or RGD.
